# Supplementary material for: Physical activity modulates mononuclear phagocytes in mammary tissue and inhibits tumor growth in mice
Source: PeerJ journal article supplement (doi:10.7717/peerj.10725), 2021-01-19
Supplement: Supplementary_Figure_2.pdf [file Supplementary_Figure_2.pdf]

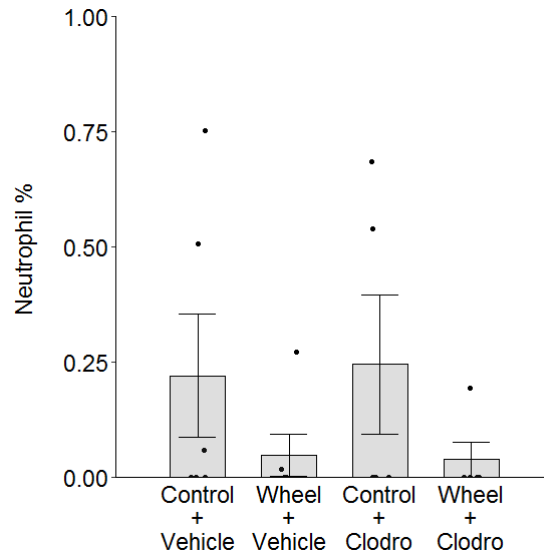

**Supplementary Figure 2.** Neutrophil proportions in mammary tissue as estimated by CIBERSORTx with the ImmuCC reference gene set at Day 1 in the immunocompetent C57BL/6-EO771 model of breast cancer, with n = 5-6 mice per group. Clodro: Clodronate.
