# Supplementary material for: Physical activity modulates mononuclear phagocytes in mammary tissue and inhibits tumor growth in mice
Source: PeerJ journal article supplement (doi:10.7717/peerj.10725), 2021-01-19
Supplement: Supplementary_Figure_3.pdf [file Supplementary_Figure_3.pdf]

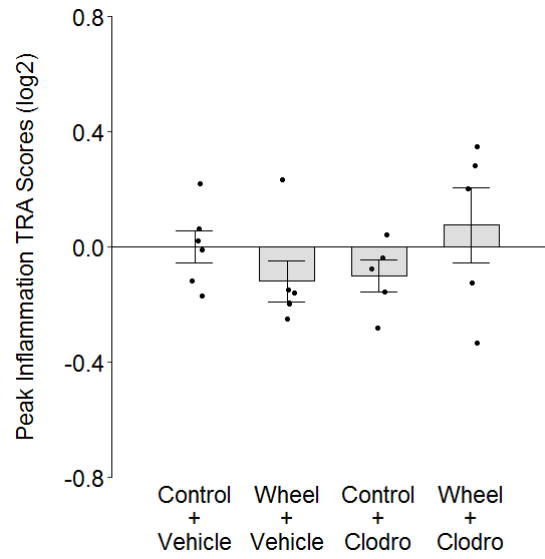

**Supplementary Figure 3.** TRA composite scores in the immunocompetent C57BL/6-EO771 model of breast cancer as a function of voluntary wheel running x clodronate treatment at Day 1 for peak inflammation from Kong et al. (2020) (genes up-regulated by 50% at peak inflammation vs. baseline, before subsequent resolution of inflammation) (Supplementary Data 6). Mean  $\pm$  SEM and individual data points, with n = 5-6 mice per group. Clodro: Clodronate.
